# Supplementary material
Source: publisher figshare collection journal article supplement (https://acs.figshare.com/ndownloader/files/4496047)
Supplement: Supplementary file 1 [file 4496047]

# Hierarchical Hollow Spheres of ZnO and Zn<sub>1-x</sub>Co<sub>x</sub>O: Directed Assembly and Room-Temperature Ferromagnetism

Yongcai Qiu,<sup>†,‡</sup> Wei Chen,<sup>†</sup> Shihe Yang,<sup>\*,†,‡</sup> B. Zhang,<sup>§</sup> X. X. Zhang,<sup>§</sup> Y. C. Zhong,<sup>§</sup> K. S. Wong<sup>§</sup>

<sup>†</sup>Nano Science and Technology Program, <sup>‡</sup>Department of Chemistry, <sup>§</sup>Department of Physics, The Hong Kong University of Science and Technology, Clear Water Bay, Kowloon, Hong Kong

## Supporting Information

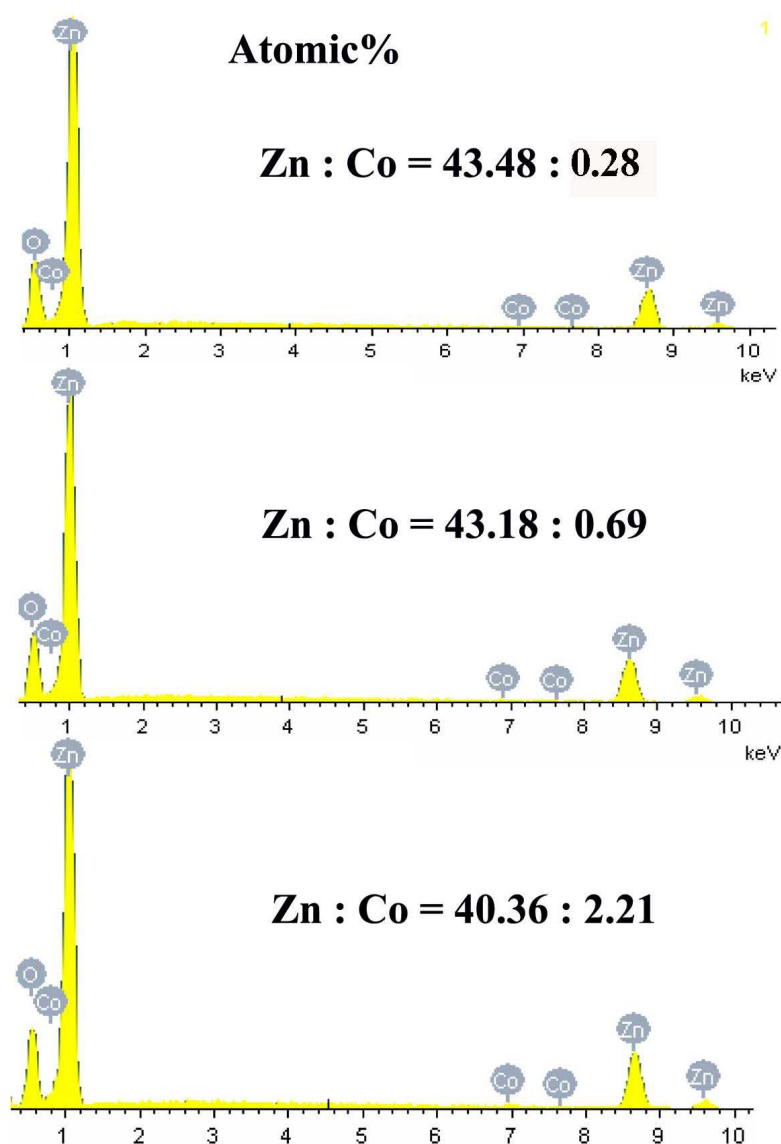

**Figure S1.** SEM EDX spectra of three as-prepared Co-doped ZnO samples with different levels of doping.
